# Supplementary material for: Factors Correlated with Home Gardening in Gauteng Province, South Africa
Source: PubMed Central journal article supplement (PMC7967462; doi:10.3390/ijerph18052737), 2021-03-08
Supplement: ijerph-18-02737-s001.pdf [file ijerph-18-02737-s001.pdf]

**Table S1.** Dependent and independent variables extracted from the 2015 QoL data that was included in the binary logistic regression model.

| Variable extracted                                                        | Description                                                                                                                                           | Expected effect |
|---------------------------------------------------------------------------|-------------------------------------------------------------------------------------------------------------------------------------------------------|-----------------|
| Y <sub>i</sub> =Grow food or vegetables                                   | Outcome variable<br>Categorical (Recorded: No =0; Yes=1)                                                                                              |                 |
| X <sub>1</sub> =SRH-Self Rated Health:<br>Self rated Health               | Categorical (recorded to two levels: poor health=0, good health=1)                                                                                    | Positive        |
| X <sub>2</sub> =Age                                                       | Continuous (Recorded into categories: 18-35=1; 36-49=2; 50-64=3; ≥65=4)                                                                               | Positive        |
| X <sub>3</sub> =Race                                                      | Categorical (Recorded: blacks=1; coloureds=2; Asians/Indians=3; whites=4; others=5)                                                                   | Positive        |
| X <sub>4</sub> =Gender                                                    | Binary (male=0; female=1)                                                                                                                             | Positive        |
| X <sub>5</sub> =Birthplace (Born in Gauteng or immigrated to Gauteng)     | Categorical (Born in Gauteng=1; immigrated from province in South Africa=2, immigrated from outside SA=3)                                             | Positive        |
| X <sub>6</sub> =No in household (size of household)                       | Numerical (Recorded: 1-3=1; 4-6=2; 7 and more=3)                                                                                                      | Positive        |
| X <sub>7</sub> =Employment status                                         | Categorical (Recorded unemployed=0; employed=1; other=3)                                                                                              | Positive        |
| X <sub>8</sub> =Education Level                                           | Categorical (recorded: no education=1; primary education only=2; secondary incomplete=3; matric=4; more than matric=5; other=6)                       | Positive        |
| X <sub>9</sub> =Grant Recipient                                           | Binary (no=0; yes=1)                                                                                                                                  | Positive        |
| X <sub>10</sub> =Membership of a club                                     | Binary (no=0; yes=1)                                                                                                                                  | Positive        |
| X <sub>11</sub> =Main source of water                                     | Categorical (Recorded: (Piped water=1; borehole/well=2; rainwater/tanks=3; River/dams=4; Water tank/truck=5; other=6)                                 | Positive        |
| X <sub>12</sub> =Water cut off in previous year?                          | Binary (no=0; Yes=1)                                                                                                                                  | Positive        |
| X <sub>13</sub> =Water source more than 20 M away?                        | Binary (No =0; Yes=1)                                                                                                                                 | positive        |
| X <sub>14</sub> =Registration of house with office                        | Binary (No=0; Yes=1)                                                                                                                                  | Positive        |
| X <sub>15</sub> =Dwelling                                                 | Categorical (recorded: own dwelling=1, rent/private=2; rent/government=3; Free RDP=4; Deed transferred=5; rent free=6; occupy vacant land=7; other=8) | Positive        |
| X <sub>16</sub> =Type of dwelling                                         | Categorical(recorded: formal=1; informal=2; other=3)                                                                                                  | Positive        |
| X <sub>17</sub> =Do children belong to school feeing scheme?              | Binary (no=0; yes=1)                                                                                                                                  | Positive        |
| X <sub>18</sub> =Did ownership adult in household skip meal in past year? | Categorical (Recorded: never=1, seldom=2 sometimes=3; often=4; always=5)                                                                              | Positive        |
| X <sub>19</sub> =Did child in home skip meal in past year?                | Categorical (Recorded: never=1, seldom=2 sometimes=3; often=4; always=5)                                                                              | Positive        |
| X <sub>20</sub> =Does your health prevent you from doing work?            | Likert scale (always=1; some of the times=2; hardly ever=3; never= 4)                                                                                 | Negative        |
| X <sub>21</sub> =Is it important to protect the environment?              | Likert scale (strongly agrees=1; agrees=2; neither agrees nor disagrees=3; disagrees=4' strongly disagrees=5)                                         | Positive        |
| X <sub>22</sub> =SAMPI                                                    | Continuous (Create 4 quartiles)                                                                                                                       | Positive        |
